# Supplementary material for: Solvent-Free Production by Extrusion of Bio-Based Poly(glycerol-co-diacids) Sheets for the Development of Biocompatible and Electroconductive Elastomer Composites
Source: MDPI journal article supplement (doi:10.3390/polym14183829), 2022-09-13
Supplement: s1 [file s1]

# Supplementary Materials: Solvent-Free Production by Extrusion of Bio-Based Poly(Glycerol-Co-Diacid) Sheets for the Development of Biocompatible and Electroconductive Elastomer Composites

Shengzhi Ji <sup>1</sup>, Mathilde Stricher <sup>1,2</sup>, Frédéric Nadaud <sup>3</sup>, Erwann Guenin <sup>1</sup>, Christophe Egles <sup>2,†,‡</sup> and Frédéric Delbecq <sup>1,\*,†</sup>

<sup>1</sup> Université de Technologie de Compiègne, ESCOM, TIMR (Integrated Transformations of Renewable Matter), Centre de Recherche Royallieu, CS 60 319, CEDEX, 60 203 Compiègne, France

<sup>2</sup> Université de Technologie de Compiègne, CNRS, BMBI (Biomechanics and Bioengineering), Centre de Recherche Royallieu, CS 60 319, CEDEX, 60 203 Compiègne, France

<sup>3</sup> UTC-SAPC, Rue du Docteur Schweitzer, CS 60319, CEDEX, 60 203 Compiègne, France

\* Correspondence: f.delbecq@escom.fr

† These authors contributed equally to this work.

‡ Current address: Normandie Université, UNIROUEN, INSA Rouen, CNRS, PBS (UMR 6270), 55 Rue Saint-Germain, 27 000 Évreux, France

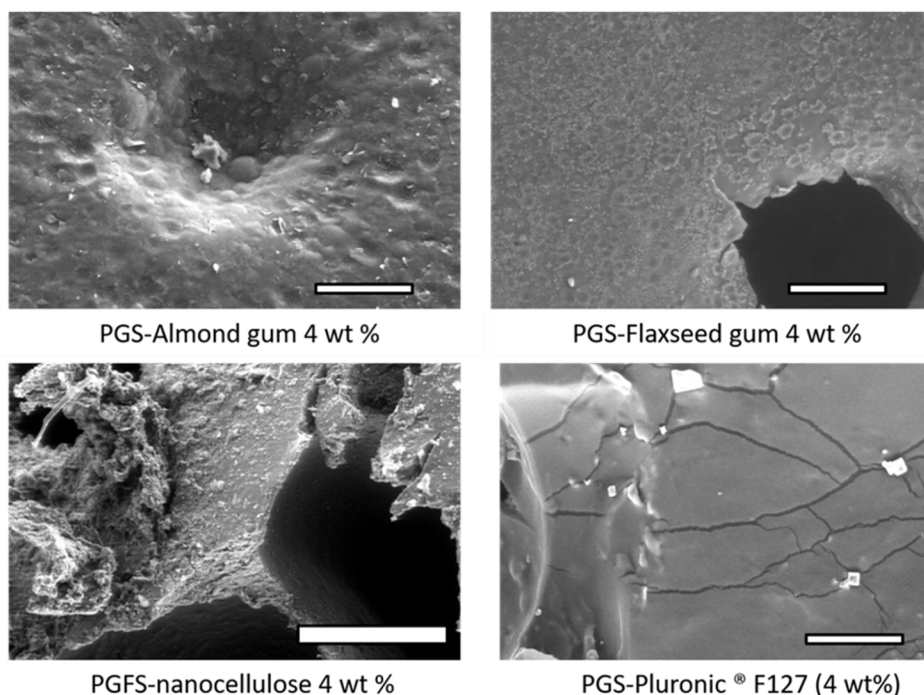

**Figure S1.** FE-SEM micrographs of various poly(glycerol-co-diacids) blended composites. The scale bars were set up at 400  $\mu$ m.

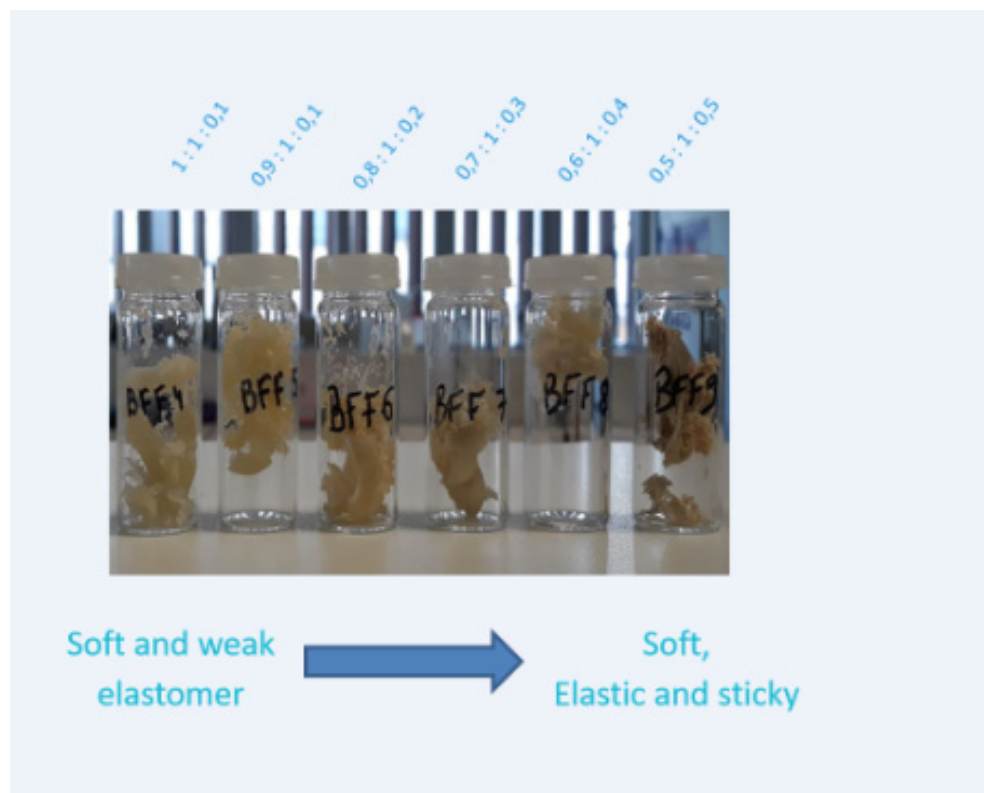

**Figure S2.** Evolution of PGFS aspect function of their SA and FDCA contents.

**a)**

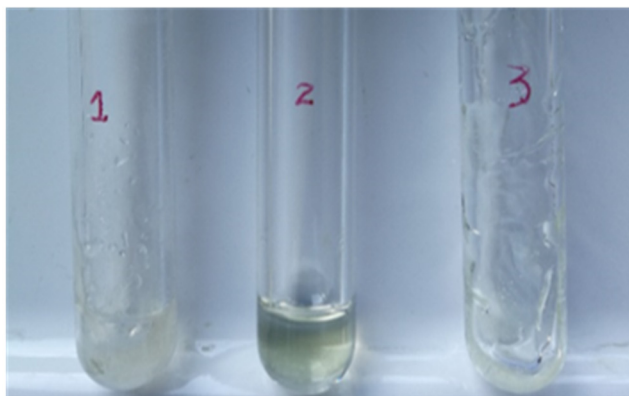

**b)**

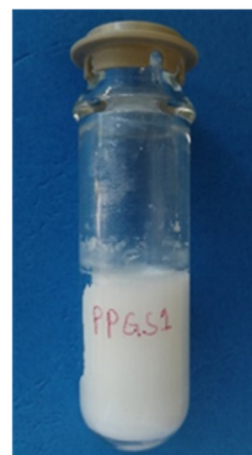

**Figure S3.** Pictures of: (a) PGI prepolymer formed under micro-wave heating (from left to right: 15 min without *p*TSA ; 5 min with *p*TSA ; 15 min with *p*TSA); (b) PGS prepolymer produced after 15 min of MW irradiation in presence of *p*TSA catalyst.

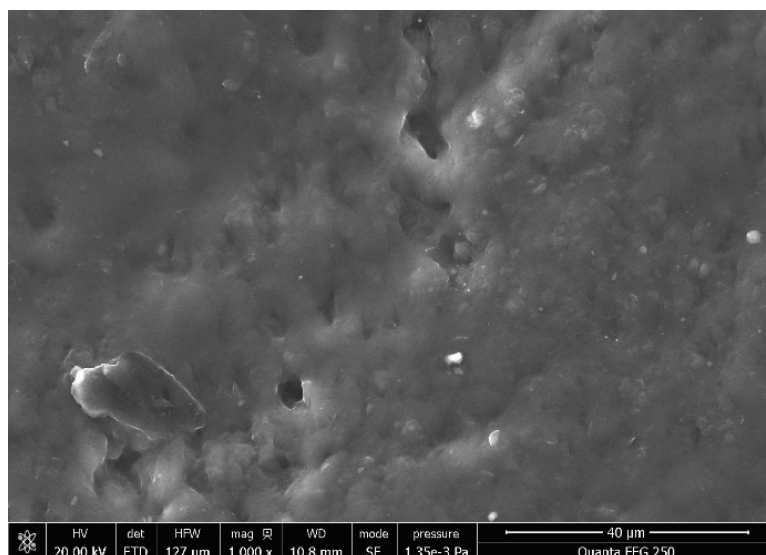

**Figure S4.** Picture of enlargement from PGS5 FE-SEM observation enlargement.

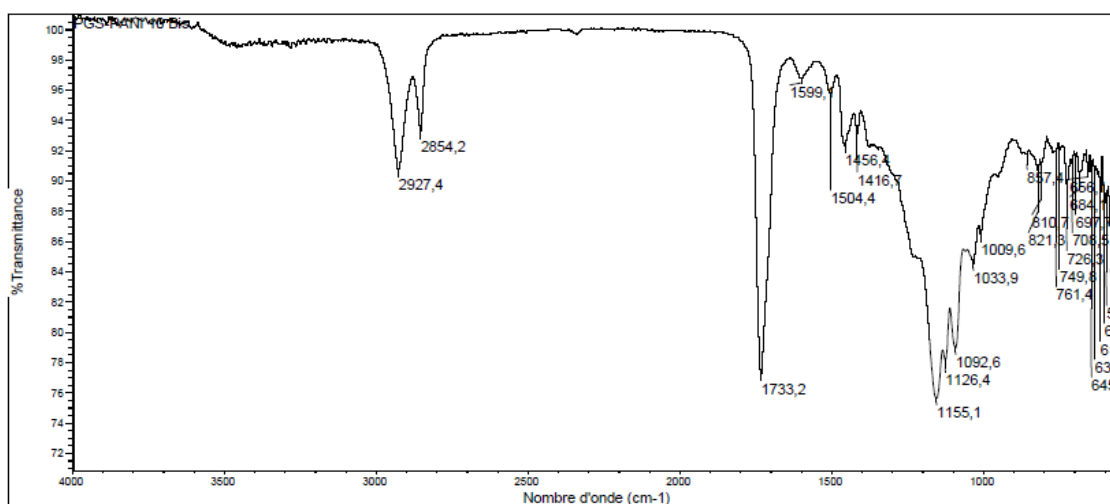

**Figure S5.** FT-IR spectrum of PGS9.

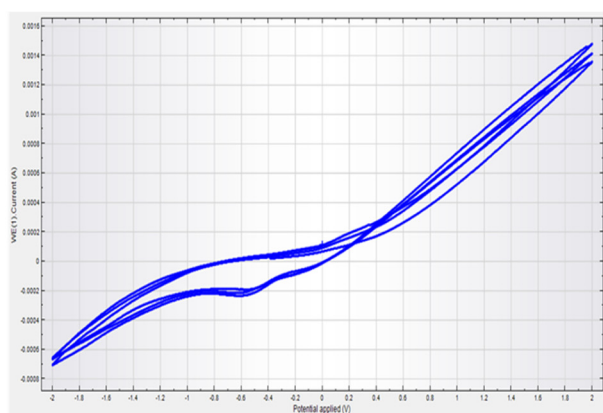

**PGS8**

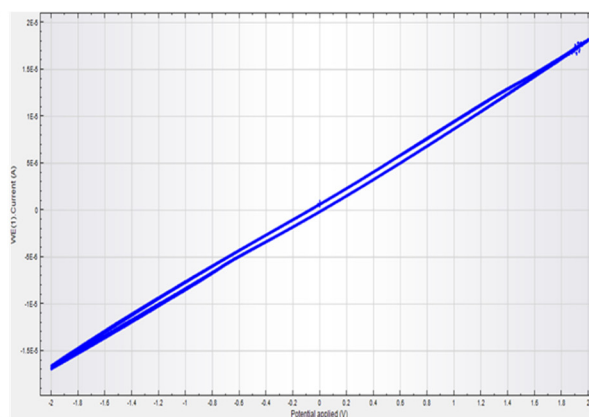

**PGS9**

**Figure S6.** Cyclic voltammograms (CV) obtained from measurements conducted in 0.1 M LiClO<sub>4</sub> aqueous solution using PGS8 and PGS9 as working electrodes.

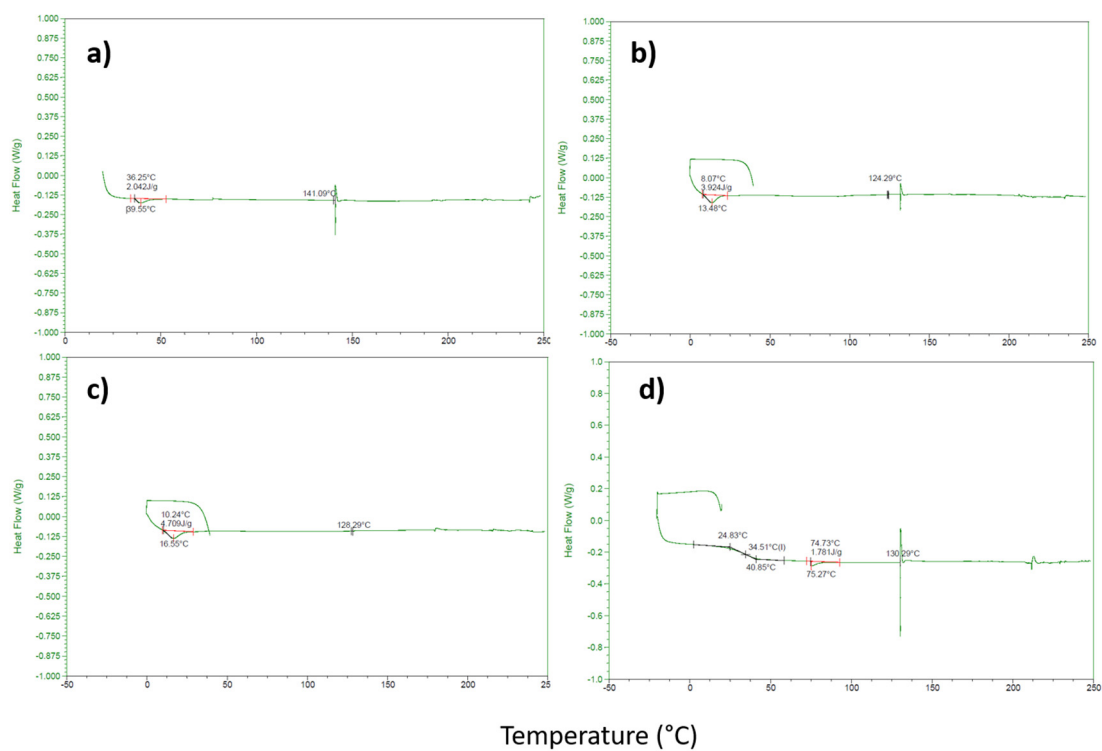

**Figure S7.** DSC thermograms of: (a) PGS1; (b) PGS2; (c) PGS3; (d) PGS4.

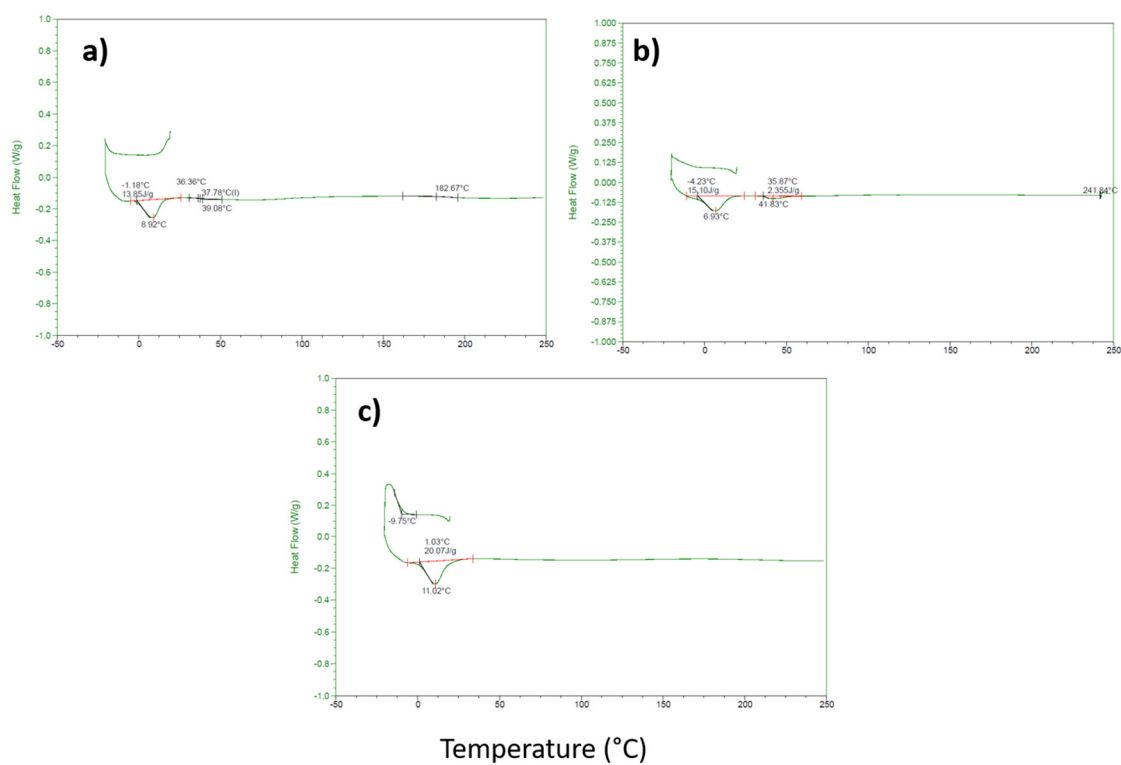

**Figure S8.** DSC thermograms of: (a) PGS5; (b) PGS6; (c) PGS7.

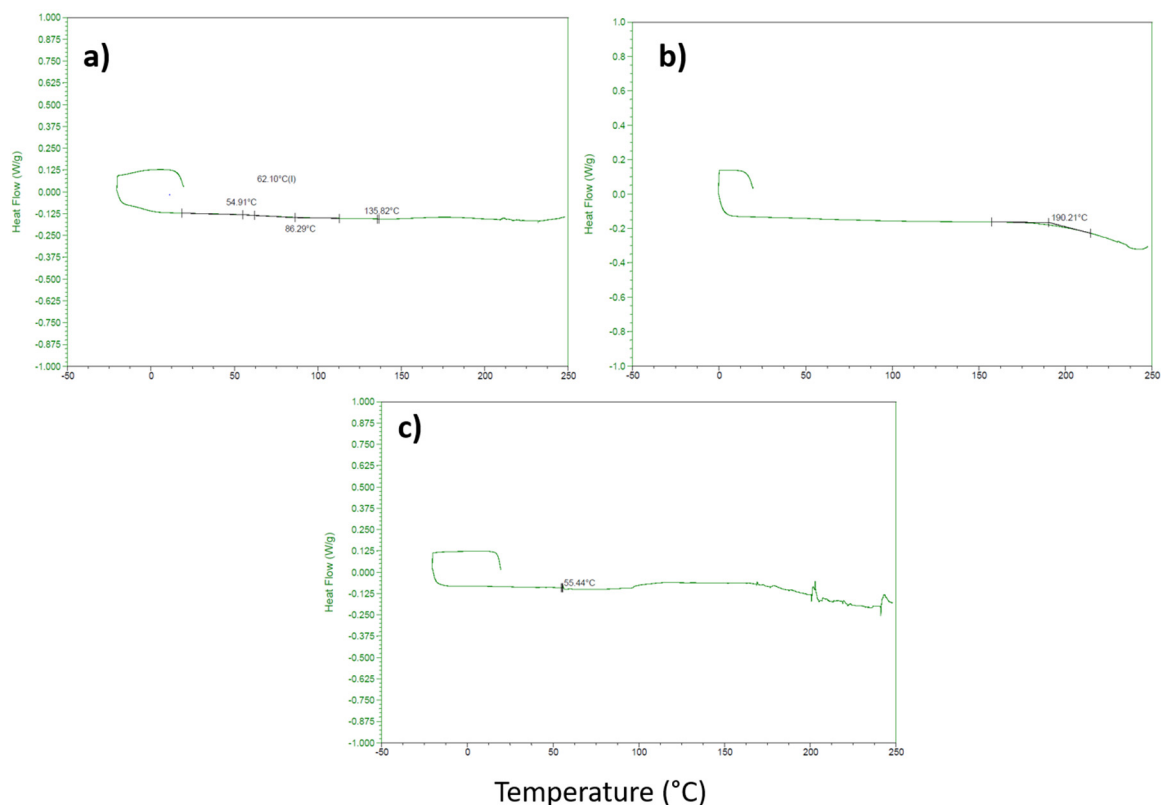

**Figure S9.** DSC thermograms of: (a) PGI2; (b) PGFS1; (c) PGFS2.

# 1. Cytotoxicity tests: General procedure for verifying cytocompatibility of polymer sheets

## Extracts:

**Latex (thickness < 0.5 mm) = 6 cm<sup>2</sup>/mL**

1 piece of 1cm<sup>2</sup> = 2cm<sup>2</sup> (both sides counting) => 5 mL medium = 15 pieces of latex

*Place 15 pieces of latex in 5 mL of medium in a 50 mL tube.*

**Elastomeric materials (thickness > 1mm) = 1.25 cm<sup>2</sup>/mL**

PGI-Co, PGS7-Co, PGS4, PGS6, PGS7 and PGFS-Co => 5 mL = 6.25 cm<sup>2</sup>

*Place material in adequate medium volume in 50 mL tube*

## Protocol:

- Seed L929 to 10,000 cells in 100 µL of complete medium per well of a 96-well plate. Incubate 24 hours at 37°C 5% CO<sub>2</sub>
- Prepare the extracts using previously sterilized materials at the required concentration. Incubate 24 hours on stirring at 37°C 5% CO<sub>2</sub>
- After 24 hours, remove the culture medium from the cells and replace with 100 µL of extract (vortexed at the end of incubation but not centrifuged). Incubate 24h at 37°C and 5% CO<sub>2</sub>.
- After 24 h of incubation, replace the medium with an MTS mix previously heated at 37°C (CellTiter 96® AQueous One Solution Cell Proliferation Assay-PROMEGA) diluted in complete DMEM (MTS mix = 20 µL of MTS reagent + 100 µL of medium). Incubate at 37°C and 5% CO<sub>2</sub> for 2 hours.
- Read absorbance at 492 nm.

- Calculate cell viability:  $\frac{DO_{EXTRACTS} - DO_{MEDIUM}}{DO_{CTRL-}} \times 100$
